# Supplementary material
Source: PubMed Central journal article supplement (PMC3407334)
Supplement: NIHMS389034-supplement-01.pdf [file NIHMS389034-supplement-01.pdf]

## SUPPLEMENTARY INFORMATION

### Plasmids and strain construction

Plasmids for the production of N-terminally tagged intein fusion derivatives of LeuRS, ProRS and EF1A (TK1461, TK0550 and TK 0308, respectively) were constructed by inserting the corresponding PCR amplified genes into pTYB11 between *SapI* and *XhoI*. For the intein tagged LeuRS, ProRS and EF1A constructs the forward primer used were 5' GTTGTTGTACAGAAC ATGGCTGAGCTTAACCTTAAG 3', 5' GTTGTTGTACAGAACATGGCGGTTGAGAGA AAGAA 3' and 5' GTTGTTGTACAGAACATGGCTAAGGAGAAG 3' and the reverse primers were 5' CTGCAGTCACCCGGGTCCTCCACAAACACCGCGGG 3', 5' CTGCAGTCAC CCGGGTCAGTAAGTCCTCGC 3' and 5' CTGCAGTCACCCGGGTCAGTCGGCCTTCTG 3', respectively. A clone containing an N-terminally His<sub>6</sub> tagged TyrRS (TK0568) was constructed by amplifying the gene from the *T. kodakarensis* DNA and ligating the purified amplicon into the *BamHI* and *HindIII* digested pQE31 plasmid. The primers used were 5' CATACTGGATCCG ATGGACATAGAAAGGAAG 3' and 5' ATTAAGCTTTTACCGGGTTATCTTTATCTC 3' flanked by *BamHI* and *HindIII* sites.

The plasmid to express the gene encoding the LeuRS-derived bait for interactome analysis was constructed as follows. The gene encoding LeuRS (*leuS*) was PCR amplified from *T. kodakarensis* DNA and the coding sequence was extended in frame by ligation of an oligonucleotide sequence that added the constitutive promoter from the *M. thermoautotrophicum* archaeal histone-encoding (*hmtB*) gene, a mutant RBS (AAGTGG), and also encoded a hemagglutinin (HA) epitope and six histidine residues (His<sub>6</sub>) at the N terminus of LeuRS (Supplementary Fig. 1). This gene was then ligated into plasmid pLC70 between *SalI* and *NotI* sites. Plasmid MR3 was similar to MR4 except that the RBS site was WT(AGGTGG). The mutant RBS was used to limit synthesis and thus mimic native expression of LeuRS in the cell (Supplementary Fig. 2).

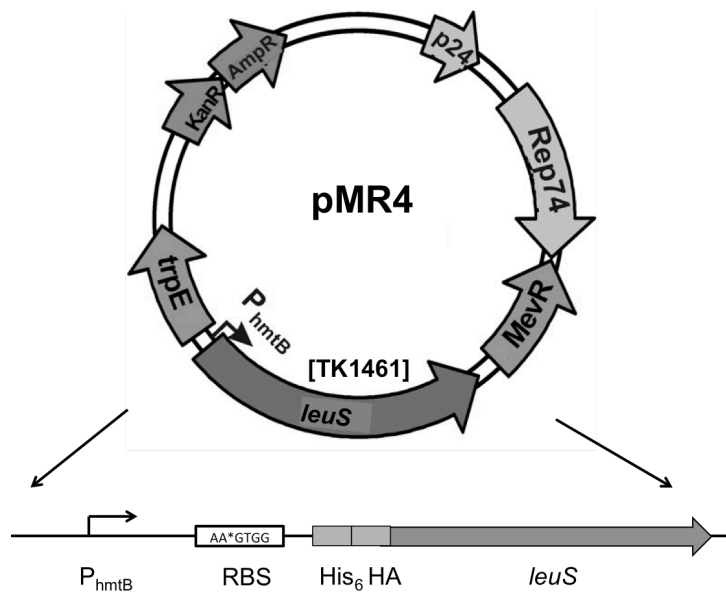

**Supplementary Figure 1.** Map of plasmid pHis<sub>6</sub>-HA-LeuRS (pMR4).

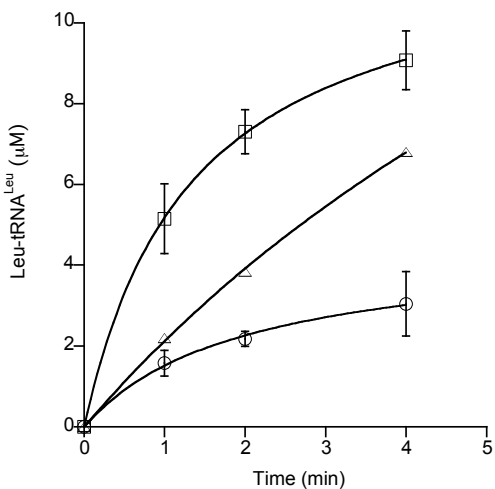

**Supplementary Figure 2.** Production of LeuRS in *T. kodakarensis* assessed by the aminoacylation activity of LeuRS. Aminoacylation activities of cell free extracts of *T. kodakarensis* strain KW128 transformed with pLC70 plasmid (a parent vector lacking a LeuRS coding sequence, open circle), pMR3 (open square) and pMR4 (open triangle) were measured with 5 μM tRNA<sup>Leu</sup> after dialyzing the extracts against 25 mM Tris-HCl pH7.5, 100 mM KCl and 10 mM beta-mercaptoethanol.

## Supplementary Table 1

Complete list of proteins that co-purified with His<sub>6</sub>-HA tagged LeuRS

| Function                         | ORF    | Description                                                   | Mascot Score |
|----------------------------------|--------|---------------------------------------------------------------|--------------|
| Translation                      | TK0568 | tyrosyl-tRNA synthetase                                       | 953          |
|                                  | TK0978 | glycyl-tRNA synthetase                                        | 435          |
|                                  | TK0550 | prolyl-tRNA synthetase                                        | 291          |
|                                  | TK1461 | leucyl-tRNA synthetase                                        | 117          |
|                                  | TK0444 | cysteinyl-tRNA synthetase                                     | 110          |
|                                  | TK1049 | methionyl-tRNA synthetase                                     | 102          |
|                                  | TK0308 | elongation factor 1-alpha                                     | 13099        |
|                                  | TK0556 | translation initiation factor IF-2B subunit beta              | 618          |
|                                  | TK1305 | translation initiation factor IF-2                            | 120          |
|                                  | TK0309 | elongation factor EF-2                                        | 214          |
|                                  | TK0506 | translation-associated GTPase                                 | 151          |
|                                  | TK1254 | 30S ribosomal protein S3Ae                                    | 369          |
|                                  | TK1529 | 30S ribosomal protein S4e                                     | 364          |
|                                  | TK1538 | 30S ribosomal protein S19P                                    | 336          |
|                                  | TK1276 | 30S ribosomal protein S19e                                    | 326          |
|                                  | TK1504 | 30S ribosomal protein S11P                                    | 319          |
|                                  | TK1505 | 30S ribosomal protein S4                                      | 299          |
|                                  | TK1496 | 30S ribosomal protein S2                                      | 294          |
|                                  | TK0307 | 30S ribosomal protein S10P                                    | 248          |
|                                  | TK1521 | 30S ribosomal protein S5P                                     | 212          |
|                                  | TK1526 | 30S ribosomal protein S8P                                     | 180          |
|                                  | TK1099 | 30S ribosomal protein S27e                                    | 178          |
|                                  | TK1500 | 30S ribosomal protein S9P                                     | 171          |
|                                  | TK1078 | 30S ribosomal protein S12P                                    | 161          |
|                                  | TK1251 | 30S ribosomal protein S15P                                    | 143          |
|                                  | TK1532 | 30S ribosomal protein S17P                                    | 131          |
|                                  | TK1951 | 30S ribosomal protein S6e                                     | 106          |
|                                  | TK1239 | peptide chain release factor 1                                | 331          |
|                                  | TK1671 | tRNA-modifying enzyme                                         | 172          |
|                                  | TK0981 | N2, N2-dimethylguanosine tRNA methyltransferase               | 170          |
|                                  | TK0970 | N(2),N(2)-dimethylguanosine tRNA methyltransferase            | 145          |
|                                  | TK0704 | SAM-dependent methyltransferase                               | 144          |
|                                  | TK1114 | ribonuclease Z                                                | 122          |
| Proteasome                       | TK2252 | proteasome-activating nucleotidase                            | 474          |
|                                  | TK1637 | proteasome subunit alpha                                      | 174          |
| Protein binding and modification | TK2303 | chaperonin beta subunit                                       | 460          |
|                                  | TK1473 | amino acid kinase                                             | 203          |
|                                  | TK1085 | protein disulfide oxidoreductase                              | 139          |
|                                  | TK1022 | D-aminopeptidase                                              | 540          |
| Metabolic enzymes                | TK0914 | 3-hydroxy-3-methylglutaryl-CoA reductase (mevanolate Pathway) | 7866         |
|                                  | TK1470 | isopentenyl pyrophosphate isomerase (mevanolate Pathway)      | 500          |
|                                  | TK0180 | acetyl-CoA acetyltransferase (mevanolate Pathway)             | 110          |
|                                  | TK0828 | NAD(P)H:rubredoxin oxidoreductase (Fatty acid metabolism)     | 120          |
|                                  | TK0187 | glutamine amidotransferase, class I                           | 437          |
|                                  | TK1404 | phosphomannomutase-related protein                            | 321          |
|                                  | TK0217 | pyridoxine biosynthesis protein                               | 1183         |

|        |                                                                         |      |
|--------|-------------------------------------------------------------------------|------|
| TK0890 | thiamine monophosphate kinase                                           | 179  |
| TK1990 | cysteine desulfurase                                                    | 521  |
| TK1796 | glutamine synthetase                                                    | 120  |
| TK0193 | GMP synthase subunit B                                                  | 184  |
| TK0504 | aspartate racemase                                                      | 166  |
| TK0297 | L-aspartate oxidase                                                     | 322  |
| TK1548 | serine--glyoxylate aminotransferase, class V (transferase-transaminase) | 258  |
| TK1379 | glycine dehydrogenase subunit 2                                         | 255  |
| TK0149 | Pyruvoyl-dependent arginine decarboxylase                               | 154  |
| TK2257 | deoxycytidylate deaminase                                               | 163  |
| TK0305 | uridylate kinase                                                        | 164  |
| TK1517 | adenylate kinase                                                        | 109  |
| TK1514 | cytidylate kinase                                                       | 305  |
| TK2196 | aspartate carbamoyltransferase catalytic subunit                        | 158  |
| TK1895 | 5'-methylthioadenosine phosphorylase II                                 | 280  |
| TK1482 | 5'-methylthioadenosine phosphorylase                                    | 158  |
| TK1193 | CTP synthetase                                                          | 105  |
| TK2042 | ATPase                                                                  | 260  |
| TK1326 | NAD(P)H-flavin oxidoreductase                                           | 471  |
| TK1299 | NADH oxidase                                                            | 432  |
| TK1056 | rubrerythrin-related protein                                            | 317  |
| TK0814 | Type A Flavoprotein                                                     | 911  |
| TK2290 | ribulose bisophosphate carboxylase                                      | 1767 |
| TK1426 | ribose-5-phosphate isomerase A                                          | 107  |
| TK2164 | fructose-1,6-bisphosphatase                                             | 140  |
| TK0866 | cofactor-independent phosphoglycerate mutase                            | 909  |
| TK2106 | phosphopyruvate hydratase                                               | 650  |
| TK1396 | glycerol kinase                                                         | 257  |
| TK1125 | 2-oxoglutarate ferredoxin oxidoreductase subunit alpha                  | 407  |
| TK1123 | 2-oxoglutarate ferredoxin oxidoreductase subunit gamma                  | 352  |
| TK1009 | putative 5-methylcytosine restriction system, GTPase subunit            | 947  |
| TK1325 | Putative oxidoreductase                                                 | 538  |
| TK1326 | ferredoxin--NADP(+) reductase subunit alpha                             | 471  |
| TK0793 | GTP cyclohydrolase                                                      | 398  |
| TK0893 | pyruvate formate lyase family activating protein                        | 298  |
| TK1984 | pyruvate ferredoxin oxidoreductase subunit beta                         | 282  |
| TK1205 | PBP family phospholipid-binding protein                                 | 272  |
| TK2077 | 4Fe-4S cluster-binding protein                                          | 254  |
| TK1611 | metal-dependent hydrolase                                               | 253  |
| TK1997 | hydrogenase maturation protein HypF                                     | 235  |
| TK1234 | lipoate-protein ligase A, C-terminal section                            | 234  |
| TK0494 | bifunctional carboxypeptidase/aminoacylase                              | 214  |
| TK0296 | quinolinate synthetase                                                  | 206  |
| TK0868 | bis(5'-adenosyl)-triphosphatase                                         | 205  |
| TK1549 | predicetd ATPase                                                        | 204  |
| TK1481 | NADH:polysulfide oxidoreductase                                         | 203  |
| TK1863 | N6-adenine-specific DNA methylase                                       | 194  |
| TK1457 | phosphate transport regulator                                           | 193  |
| TK2016 | iron-molybdenum cofactor-binding protein                                | 192  |
| TK2225 | molybdenum cofactor biosynthesis protein A                              | 182  |
| TK0134 | acetylpolyamine aminohydrolase                                          | 140  |
| TK1149 | methylmalonyl-CoA mutase, N-terminus of large subunit                   | 172  |

|                       |        |                                                     |     |
|-----------------------|--------|-----------------------------------------------------|-----|
|                       | TK1605 | metallo-beta-lactamase superfamily hydrolase        | 134 |
|                       | TK1716 | cytidyltransferase                                  | 128 |
|                       | TK0354 | putative molybdenum cofactor biosynthesis protein C | 127 |
|                       | TK0828 | NAD(P)H:rubredoxin oxidoreductase                   | 120 |
|                       | TK1711 | sugar-phosphate nucleotidyltransferase              | 108 |
| Cell Division         | TK2271 | cell division protein FtsZ                          | 821 |
| Transcription         | TK1331 | Lrp/AsnC family transcriptional regulator           | 378 |
|                       | TK1881 | ArsR family transcriptional regulator               | 113 |
|                       | TK1083 | DNA-directed RNA polymerase subunit beta            | 373 |
|                       | TK1503 | DNA-directed RNA polymerase subunit D               | 302 |
|                       | TK1769 | transcriptional regulator                           | 364 |
| DNA repair            | TK2213 | Bipolar DNA helicase                                | 448 |
|                       | TK1899 | DNA repair and recombination protein RadA           | 323 |
|                       | TK0155 | RecJ-like exonuclease                               | 476 |
|                       | TK1165 | AP endonuclease (base excision repair pathway)      | 365 |
| Ribosome Biogenesis   | TKO566 | DEAD/DEAH box RNA helicase                          | 175 |
|                       | TK0679 | serine/threonine protein kinase                     | 111 |
|                       | TK1636 | putative RNA-associated protein                     | 167 |
| Quorum sensing        | TK1605 | metallo-beta-lactamase superfamily hydrolase        | 134 |
| Miscellaneous         | TK1764 | N-acetylchitobiose deacetylase                      | 124 |
|                       | TK0038 | flagellin                                           | 118 |
|                       | TK1037 | calcineurin superfamily metallophosphoesterase      | 118 |
|                       | TK0008 | DNA methylase                                       | 115 |
|                       | TK0798 | DNA topoisomerase VI subunit A                      | 209 |
|                       | TK0799 | DNA topoisomerase VI subunit B                      | 192 |
|                       | TK2213 | bipolar DNA helicase                                | 448 |
| Hypothetical Proteins | TK1492 |                                                     | 921 |
|                       | TK2200 |                                                     | 813 |
|                       | TK0453 |                                                     | 687 |
|                       | TK0675 |                                                     | 626 |
|                       | TK1430 |                                                     | 592 |
|                       | TK2148 |                                                     | 474 |
|                       | TK0033 |                                                     | 349 |
|                       | TK0205 |                                                     | 324 |
|                       | TK1196 |                                                     | 268 |
|                       | TK1424 |                                                     | 261 |
|                       | TK0027 |                                                     | 259 |
|                       | TK0013 |                                                     | 240 |
|                       | TK1497 |                                                     | 205 |
|                       | TK0175 |                                                     | 200 |
|                       | TK0897 |                                                     | 193 |
|                       | TK1996 |                                                     | 198 |
|                       | TK0593 |                                                     | 176 |
|                       | TK0361 |                                                     | 152 |
|                       | TK0109 |                                                     | 147 |
|                       | TK0515 |                                                     | 140 |
|                       | TK1626 |                                                     | 140 |
|                       | TK0335 |                                                     | 140 |
|                       | TK0733 |                                                     | 135 |
|                       | TK0318 |                                                     | 135 |
|                       | TK0206 |                                                     | 124 |
|                       | TK0438 |                                                     | 123 |
|                       | TK0790 |                                                     | 111 |

|  |        |  |     |
|--|--------|--|-----|
|  | TK2038 |  | 111 |
|  | TK2294 |  | 107 |
|  | TK1882 |  | 105 |
